# Supplementary material for: Integrating silver compounds and nanoparticles into ceria nanocontainers for antimicrobial applications
Source: Royal Society of Chemistry journal article supplement (doi:10.1039/c4tb02079k), 2015-01-01
Supplement: c4tb02079k1.pdf [file c4tb02079k1.pdf]

Supplementary information

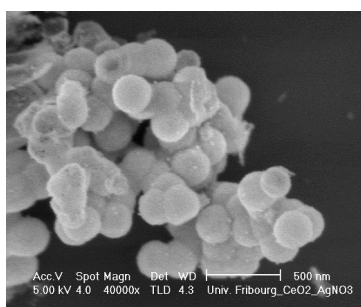

**Fig. S1** SEM image of  $\text{AgNO}_3/\text{CeO}_2$  capsules. Formed silver nanoparticles appear as white spots on the surface of capsules on the SEM image.

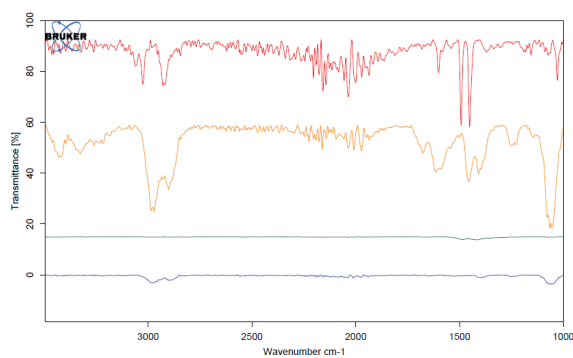

**Fig. S2** FTIR spectra of polystyrene nanospheres (red), AgNP/PS coated with  $\text{CeO}_2$  (yellow), AgNP/ $\text{CeO}_2$  capsules obtained by calcination (green), and AgNP/ $\text{CeO}_2$  capsules obtained by dissolution (blue).
